# Supplementary material for: Tagging to endogenous genes of Plasmodium falciparum using CRISPR/Cas9
Source: PubMed Central journal article supplement (PMC5712073; doi:10.1186/s13071-017-2539-0), 2017-12-02
Supplement: 13071_2017_2539_MOESM1_ESM.pdf [file 13071_2017_2539_MOESM1_ESM.pdf]

**a. Annealed DNA for replacing yFCU expression cassette in pL6cs plasmid**

5' -AGGTGACACTATAGAATACTCAAGCTGCGGCCCTAGTCTAGGGcGCGCCatgtaggcgccaact  
3' -TCCACTGTGATATCTTATGAGTTCGACGCCGGGATCAGATCCCgCGCGGtacatccgcggttga

**b. Primers for adding HA tag to C-terminus of ck2 $\beta$ 1 using CRISPR/Cas9**

P3 tcatctcttatcaataatagctgg  
P4 ACCTCCAGAACCCTTCCggtttcagaaattttagtagttcttc  
P5 CTGAcTAcGCATAaacataaacctaaatatatttaaatttatatg  
P6 aactgatcttaaaattagacatgatc  
P7 acgGGAAGTGGTTCTGGAGGTTATCCTTAcGATGTTCCAGAcTATGCAATATATC  
P8 atatatatttaggtttatgtttaTGCgTAgTCAGGcACATC  
P9 CATATTTATTAAATCTAGAATTcttatcaataatagctggggatgcac  
P10 GTTATTATTTTTACCGTtccatgGgacatgatcataagaaaaaggtgtc  
P11 gtatttttaaaaagTTACgTaaAgaagaactacaaatttctgaaacg  
P12 gttcttcTttAcGTAAcTTTTtaaaatactttggattttttttaag  
P13 CATATTAAGTATATAATATTgtatttttaaaaagcttagaagtttagagctagaaatag  
P14 ctatttctagctctaaaacttctaagcttttttaaaatacAATATTATATACTTAATATG

**c. Primers for adding HA-TY1 tag to C-terminus of ck2 $\alpha$  using CRISPR/Cas9**

P15 gcattggattattgtcatagccaag  
P16 CCACTTCctgattcTtcTCTgacttctctaaagtaaggatgctcc  
P17 CCCATTAGATtaataataataaaaaaaaaatgcacacatat  
P18 caattgaaaattttggaaaaaattttatg  
P19 gaagtcAGAgAgaAaatcaGGAAGTGGTTCTGGAGGTTATC  
P20 gtgtgcatttttttttattattattaATCTAATGGGTCTTGATTAGTGTGTAC  
P21 GGCCCTAGTCTAGGGcGCGCCattggattattgtcatagccaag  
P22 ATTTTTTTTTACAAAATGCTTAAGgaaaaagaagacatggtttggtttg  
P23 ATATTAAGTATATAATATTgttacttttagagaagtccgtggttttagagctagaaatag  
P24 ctatttctagctctaaaaccacggacttctctaaagtaacAATATTATATACTTAATAT

**d. Primers for adding HA-TY1 tag to C-terminus of stk using CRISPR/Cas9**

P25 CCATTAGATtgatttaaaaaaacggaatttttttttttttaaaag  
P26 TTTTTTACAAAATGCTTAAGgtaagctcttctatttcaaaatacaaatc  
P27 GGCCCTAGTCTAGGGcGCGCCtttgttttggttgggacatatc  
P28 CctcattgtcTtcTtcAaGgttaagaataaatatttctgctgc  
P29 acCtTgaAgaAgacaatgagGGAAGTGGTTCTGGAGGTTATC  
P30 ccgtttttttttaaatcaATCTAATGGGTCTTGATTAGTGTGTAC  
P31 ATATTAAGTATATAATATTgtattattcttaacttagagggtttagagctagaaatag  
P32 ctatttctagctctaaaaccctctaagttaagaataatacAATATTATATACTTAATAT

**e. DNA cassettes to express sgRNAs of 3 genes**

ck2 $\beta$ 1 gtatttttaaaaagcttagaaagg (agg is the PAM)  
ck2 $\alpha$  ttacttttagagaagtccgtgagg (agg is the PAM)  
stk tattattcttaacttagaggagg (agg is the PAM)

**f. Primers to check the tagging of 3 genes by PCR**

P33 ttatatggattaaaaacggagatcc  
P34 caaataaaataatgcaaaggaatcac  
P1 cctaaatttacagataaggatattcg  
P2 gttgagcacatttttctctataaggg  
P35 ctttgatgaagatgggaatttgtatg  
P36 cccaattctaatatgctcaaaag
